# Supplementary material for: Cesium-doped ammonium vanadium bronze nanosheets as high capacity aqueous zinc-ion battery cathodes with long cycle life and superb rate capability
Source: Royal Society of Chemistry journal article supplement (doi:10.1039/d3nr04602h), 2023-01-01
Supplement: d3nr04602h1.pdf [file d3nr04602h1.pdf]

## Supplementary Material

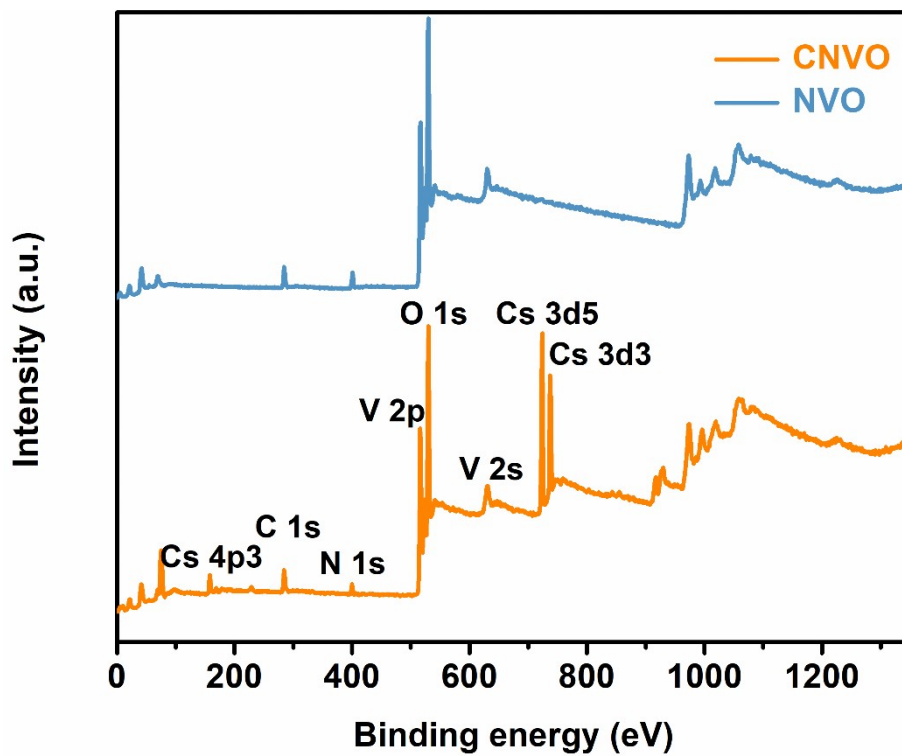

Fig. S1. XPS spectra of CNVO and NVO.

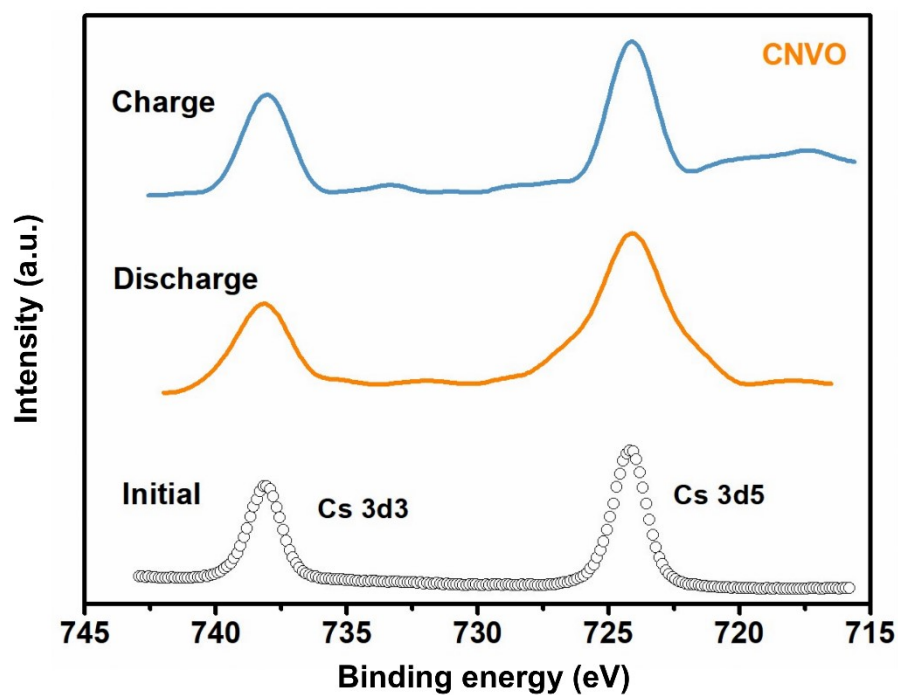

Fig. S2. XPS spectra of Cs 3d3 and Cs 3d5 of CNVO.

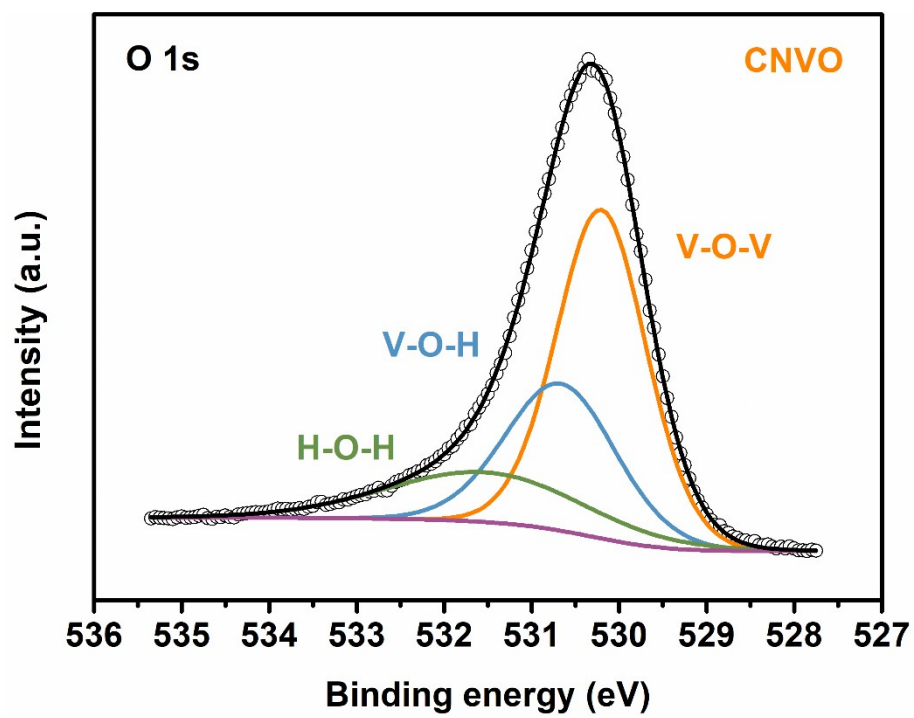

Fig. S3. XPS spectra of O 1s of CNVO.

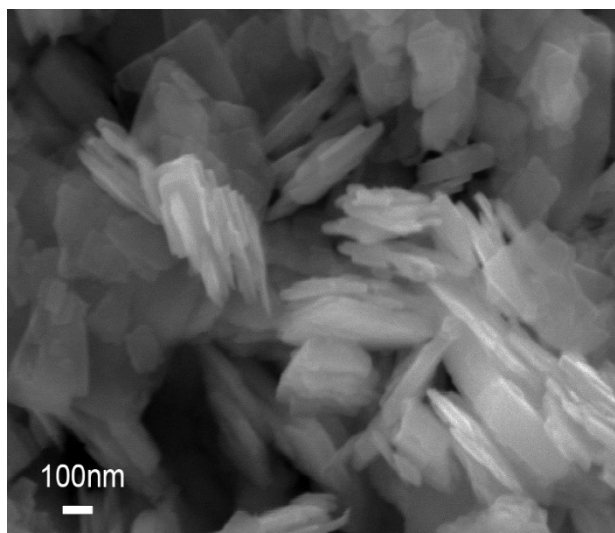

Fig. S4. Field Emission Scanning Electron Microscope (FE-SEM) image of CNVO.

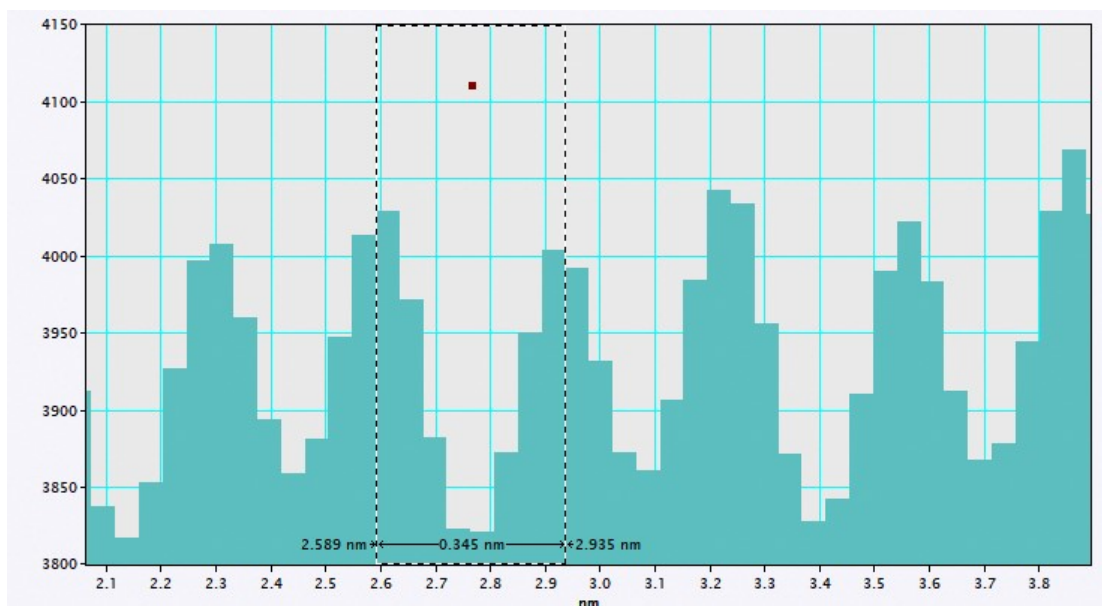

**Fig.S5.** Lattice diffraction stripe size of CNVO.

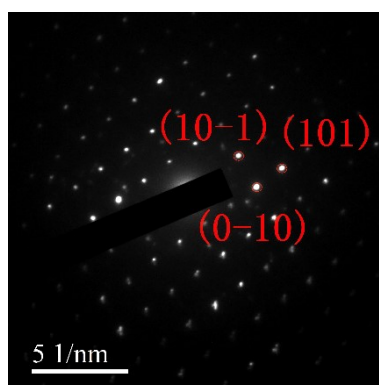

**Fig. S6.** SAED image of CNVO.

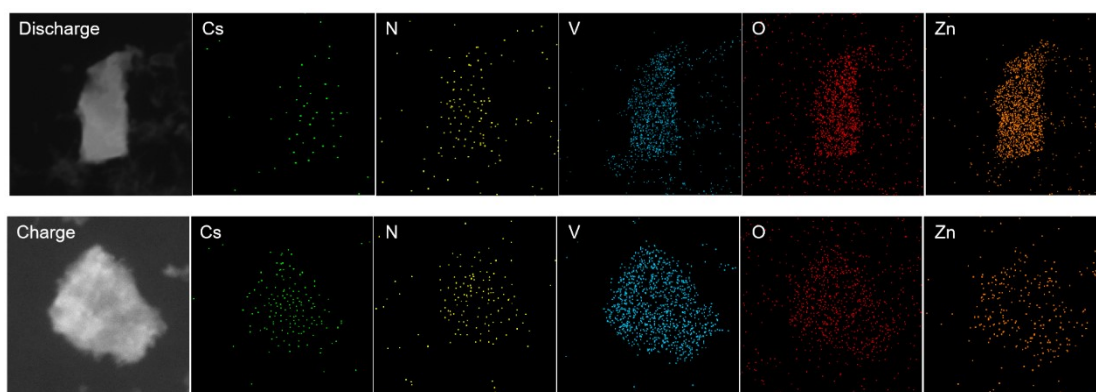

**Fig.S7.** EDS mapping images of CNVO in different charging and discharging states.

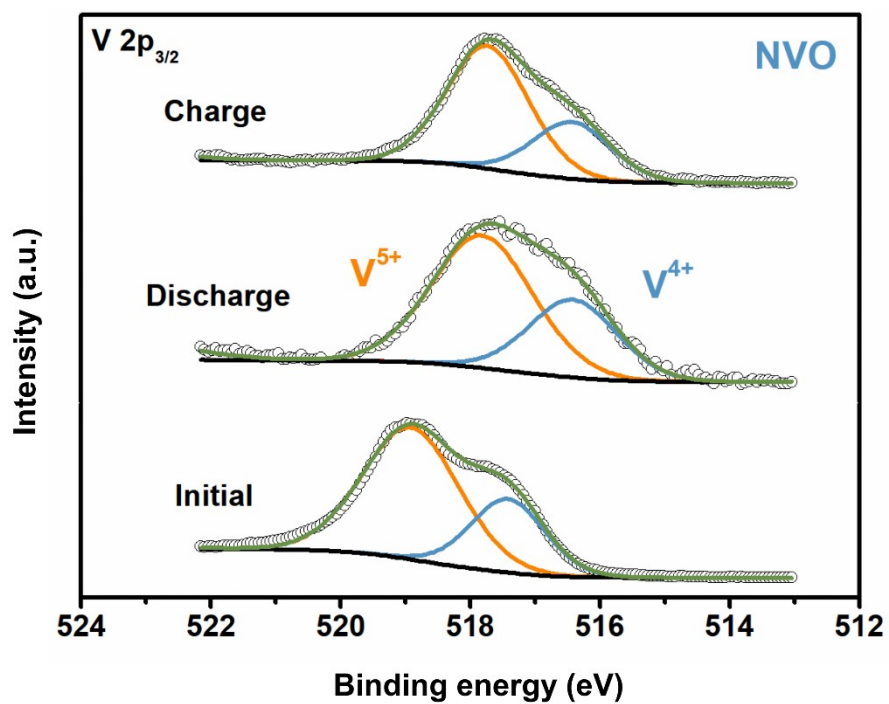

Fig. S8. XPS spectra of V 2p<sub>3/2</sub> of NVO.

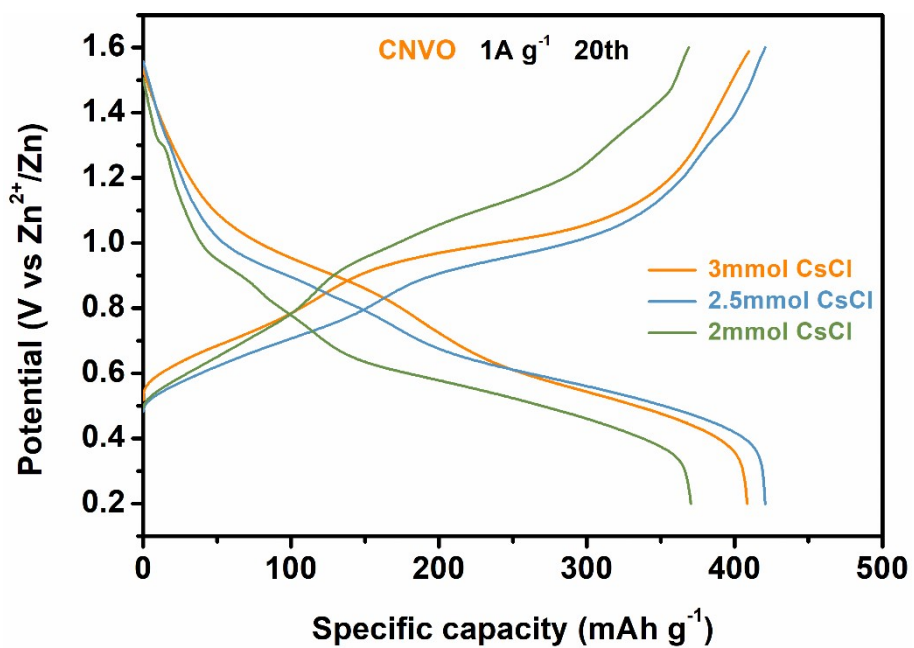

Fig. S9. 20th charge/discharge curves of CNVO with different Cs<sup>+</sup> molar ratios at 1 A g<sup>-1</sup> current density.

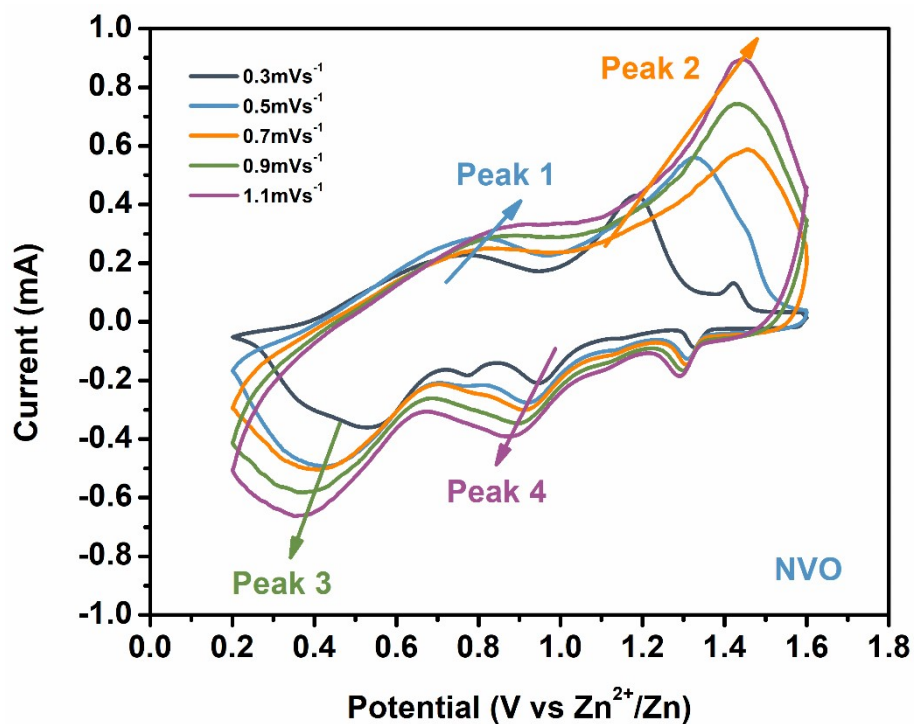

Fig. S10. CV curves of NVO at different scan rates.

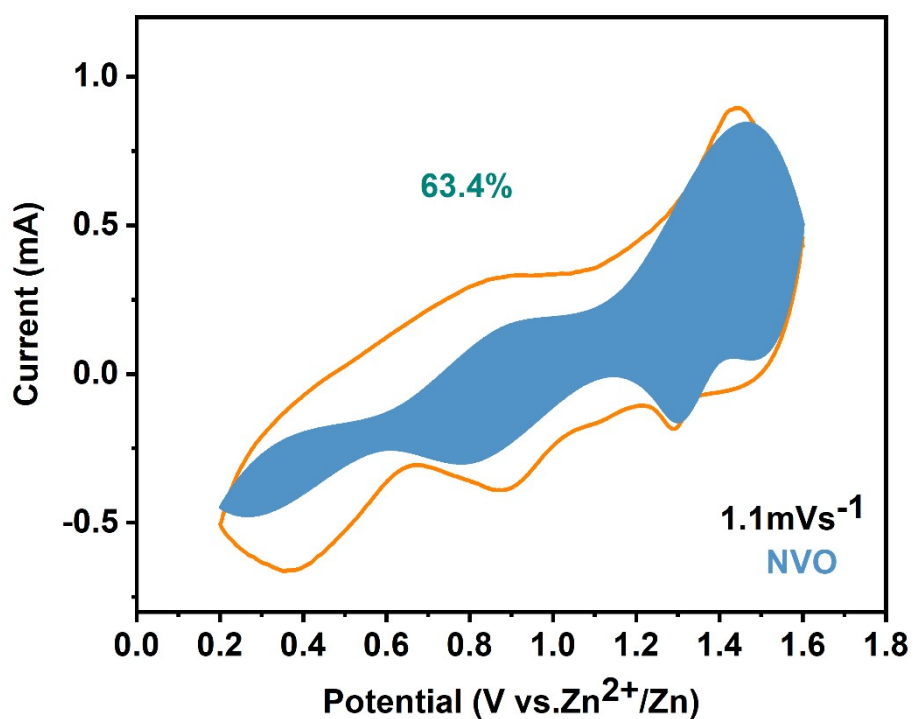

Fig. S11. Pseudocapacitance fitting results of CNVO at 1.1  $mVs^{-1}$  scan rate.

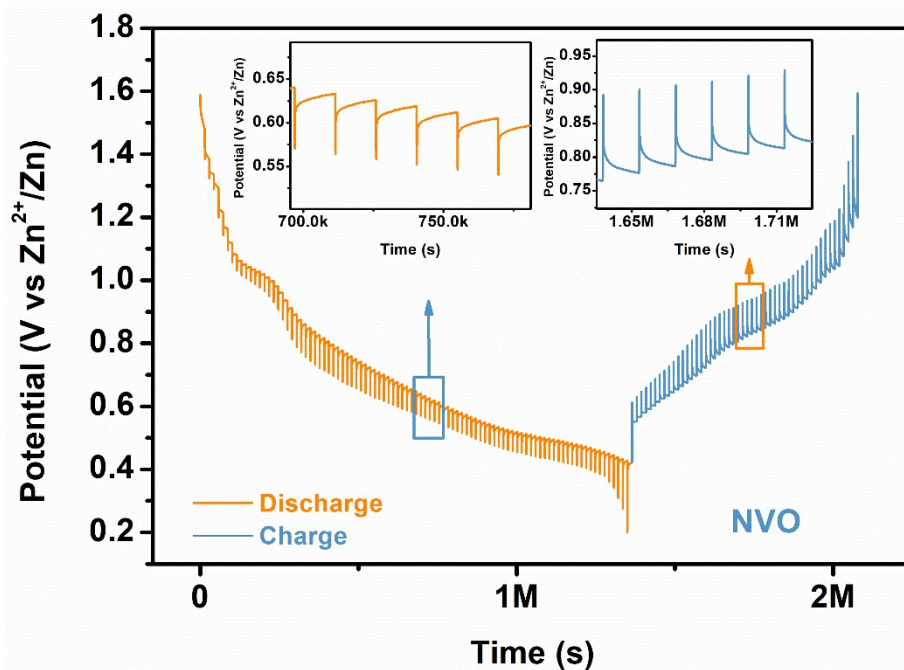

Fig. S12. GITT curves of NVO.

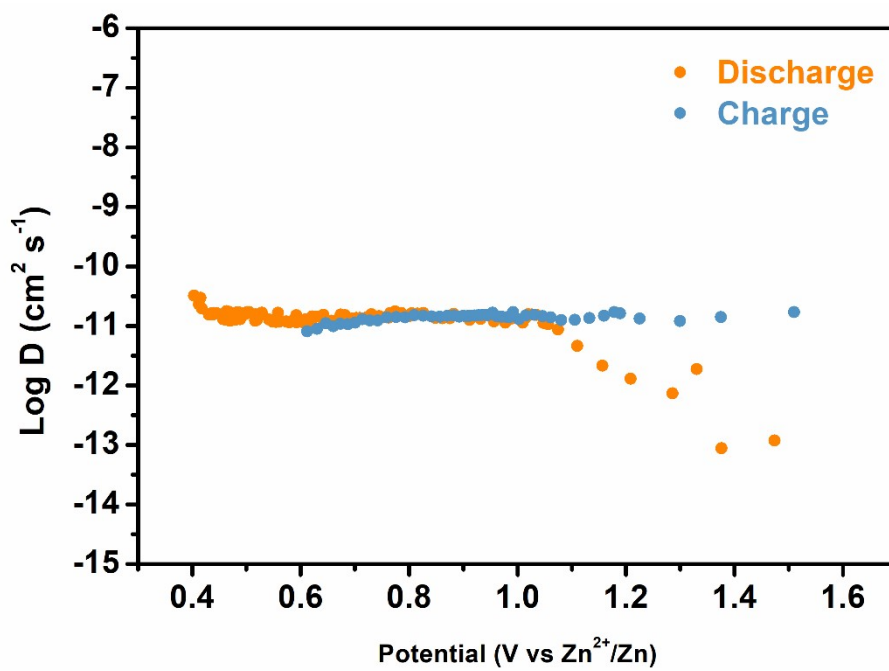

Fig. S13. Calculated diffusion coefficients of NVO.

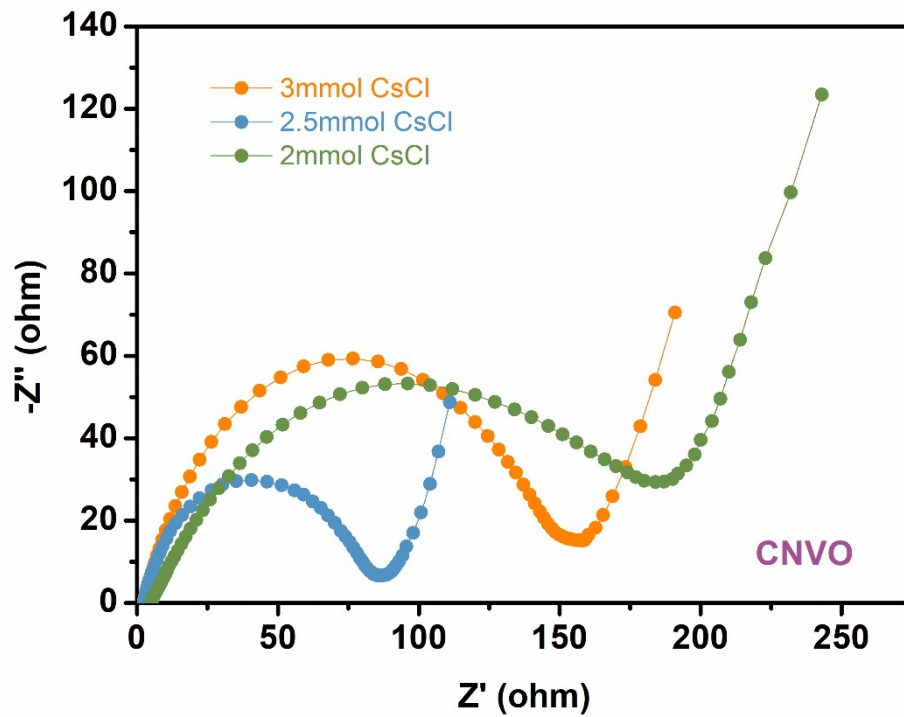

**Fig. S14.** EIS curves of CNVO with different Cs<sup>+</sup> molar ratios.

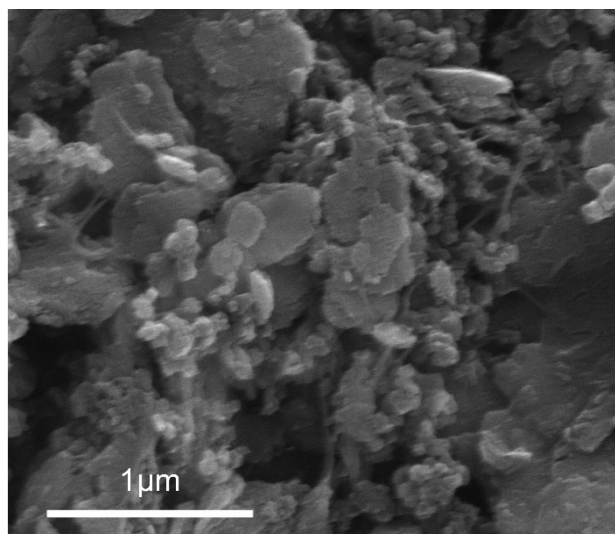

**Fig. S15.** SEM image of CNVO cathode material charged to 1.6 V for the 20th time.

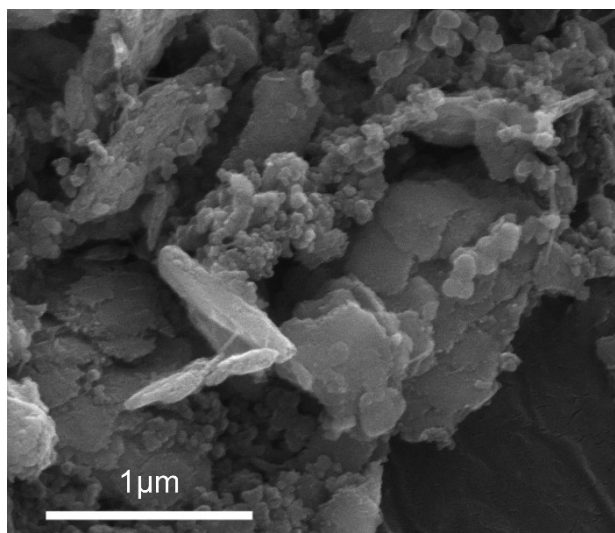

**Fig. S16.** SEM image of CNVO cathode material charged to 1.6 V for the 50th time.



**Table. S1.** Inductively coupled plasma-optical emission spectroscopy of CNVO samples.

| Sample Quality (g) | Fixed volume $V_0$ (ml) | Test elements | Test element concentration $C_0$ (mg/L) | Dilution times $f$ | The elemental concentration of digestion solution/original sample solution $C_1$ (mg/L) | Sample elemental content $C_x$ (mg/kg) | Sample elemental content $W$ (%) |
|--------------------|-------------------------|---------------|-----------------------------------------|--------------------|-----------------------------------------------------------------------------------------|----------------------------------------|----------------------------------|
| 0.1264             | 25.00                   | Cs            | 0.04                                    | 1000               | 35.80                                                                                   | 7080.70                                | 0.7081%                          |
| 0.1264             | 25.00                   | V             | 2.08                                    | 1000               | 2080.83                                                                                 | 411557.04                              | 41.1557%                         |
| 0.0125             | 25.00                   | N             | 21.96                                   | 1                  | 21.96                                                                                   | 43922.00                               | 4.3922%                          |

**Table. S2.** Comparison of the electrochemical performance of CNVO with other reported zinc-ion batteries.

| Cathode                                                                 | Electrolyte                               | Specific capacity                                  | Rate performance                                    | Cycling stability                                                            | Ref. |
|-------------------------------------------------------------------------|-------------------------------------------|----------------------------------------------------|-----------------------------------------------------|------------------------------------------------------------------------------|------|
| $(\text{NH}_4)_2\text{V}_4\text{O}_9 \cdot 0.5\text{H}_2\text{O}$       | 2 M $\text{ZnSO}_4$ aqueous solution      | 374.3 mAh $\text{g}^{-1}$ at 0.2 A $\text{g}^{-1}$ | 101 mAh $\text{g}^{-1}$ at 15 A $\text{g}^{-1}$     | 84% after 1000 cycles at 5 A $\text{g}^{-1}$                                 | [1]  |
| $\text{Mg}_{0.34}\text{V}_2\text{O}_5 \cdot 0.84\text{H}_2\text{O}$     | 3 M $\text{Zn}(\text{CF}_3\text{SO}_3)_2$ | 352 mA h $\text{g}^{-1}$ at 100 mA $\text{g}^{-1}$ | 264 mA h $\text{g}^{-1}$ at 1000 mA $\text{g}^{-1}$ | ~97 % capacity retention for at least 2000 cycles at 5000 mA $\text{g}^{-1}$ | [2]  |
| $\delta\text{-Ni}_{0.25}\text{V}_2\text{O}_5 \cdot n\text{H}_2\text{O}$ | ---                                       | 402 mAh $\text{g}^{-1}$ at 0.2 A $\text{g}^{-1}$   | 225 mAh $\text{g}^{-1}$ at 5 A $\text{g}^{-1}$      | 98 % over 1200 cycles at 5 A $\text{g}^{-1}$                                 | [3]  |
| $\text{NaCa}_{0.6}\text{V}_6\text{O}_{16} \cdot 3\text{H}_2\text{O}$    | 3 M $\text{Zn}(\text{CF}_3\text{SO}_3)_2$ | 347 mAh $\text{g}^{-1}$ at 0.1 A $\text{g}^{-1}$   | 154 mAh $\text{g}^{-1}$ at 5 A $\text{g}^{-1}$      | 94% after 2,000 cycles at 2 A $\text{g}^{-1}$                                | [4]  |
| $\text{V}_6\text{O}_{13}@CC$                                            | 3 M $\text{ZnSO}_4$                       | 431 mAh $\text{g}^{-1}$ at 0.2 A $\text{g}^{-1}$   | 227 mAh $\text{g}^{-1}$ at 9 A $\text{g}^{-1}$      | nearly 99% after 1000 cycles at 9 A $\text{g}^{-1}$                          | [5]  |
| Al-doped $\text{V}_{10}\text{O}_{24} \cdot 12\text{H}_2\text{O}$        | 3 M $\text{Zn}(\text{CF}_3\text{SO}_3)_2$ | 290 mAh $\text{g}^{-1}$ at 0.375 A $\text{g}^{-1}$ | 294.5 mAh $\text{g}^{-1}$ at 5 A $\text{g}^{-1}$    | 98% capacity retention after 3000 cycles                                     | [6]  |

## References

- 1 R. Wei, X. Wang, B. Xi, Z. Feng, H. Li, W. Chen, Y. Jia, J. Feng, & S. Xiong, *ACS Appl. Energy Mater.*, 2020, **3**, 5343–5352.
- 2 F. Ming, H. Liang, Y. Lei, S. Kandambeth, M. Eddaoudi, & H. N. Alshareef, *ACS Energy Lett.*, 2018, **3**, 2602–2609.
- 3 J. Li, K. McColl, X. Lu, S. Sathasivam, H. Dong, L. Kang, Z. Li, S. Zhao, A. G. Kafizas, R. Wang, D. J. L. Brett, P. R. Shearing, F. Cora, G. He, C. J. Carmalt, & I. P. Parkin, *Adv. Energy Mater.*, 2020 **10**, 2000058.
- 4 K. Zhu, T. Wu, & K. Huang, *Adv. Energy Mater.*, 2019, **9**, 1901968.
- 5 M. Tamilselvan, T. V. M. Sreekanth, K. Yoo, & J. Kim, *Appl. Surf. Sci.*, 2020, **529**, 147077.
- 6 Q. li, T. Wei, K. Ma, G. Yang, & C. Wang, *ACS Appl. Mater. Interfaces*, 2019, **11**, 20888–20894.
